# Supplementary material
Source: HighWire-hosted journal article supplement (https://bjsm.bmj.com/content/51/8/658)
Supplement: inline-supplementary-material-2 [file inline-supplementary-material-2.pdf]

Supplementary Table<sup>1</sup>

| Study                     | 1 |   | 2 |   | 3 | 4 |   | 5 | 6 | 7 | 8 |   | 9 | 10 | 11 |   | 12 |   | 13 |   | 14 | 15 | 16 | 17 | 19 | 20 | 21 | 22 | 25 |
|---------------------------|---|---|---|---|---|---|---|---|---|---|---|---|---|----|----|---|----|---|----|---|----|----|----|----|----|----|----|----|----|
|                           | a | b | a | b | a | a | b | a | a | a | a | b |   |    | a  | b | a  | b | a  | b | a  |    |    | a  |    |    |    |    |    |
| Baguet et al. [7]         | - | + | + | + | + | + | + | + | + | - | - | + | - | -  | +  | + | +  | + | +  | + | -  | -  | +  | +  | +  | -  | +  | +  | +  |
| Bellinger et al. [13]     | - | + | + | + | + | + | + | + | + | + | - | - | - | -  | +  | + | +  | + | +  | - | -  | -  | +  | +  | +  | +  | +  | +  | +  |
| Bellinger and Minhan [51] | - | + | + | + | + | + | + | + | + | - | - | - | - | -  | +  | + | +  | + | +  | + | -  | +  | +  | +  | +  | +  | +  | +  | +  |
| Carpentier et al. [52]    | - | + | + | + | + | + | + | + | + | - | - | - | - | -  | +  | + | +  | + | +  | + | -  | +  | +  | +  | +  | +  | +  | +  | +  |
| Chung et al. [53]         | - | + | + | + | + | - | + | + | + | - | - | - | - | +  | +  | + | +  | + | +  | - | -  | -  | +  | +  | +  | -  | +  | +  | +  |
| Chung et al. [53]         | - | + | + | + | + | + | + | + | + | + | - | - | - | -  | +  | + | +  | + | +  | + | -  | +  | +  | +  | +  | +  | +  | +  | +  |
| Cochran et al. [54]       | - | + | + | + | + | + | + | + | + | - | - | - | - | -  | +  | + | +  | + | +  | + | -  | +  | +  | +  | +  | +  | +  | +  | +  |
| Del Favero et al. [44]    | - | + | + | + | + | + | + | + | + | - | + | + | + | -  | +  | + | +  | + | +  | - | -  | +  | +  | +  | +  | +  | +  | +  | +  |
| Derave et al. [5]         | - | + | + | + | + | + | + | + | + | - | + | + | - | -  | +  | + | +  | + | +  | - | -  | -  | +  | +  | +  | +  | +  | +  | +  |
| Ghiasvand et al. [55]     | - | + | + | + | + | + | + | + | + | - | - | - | - | -  | +  | + | +  | + | +  | - | -  | -  | +  | +  | +  | +  | +  | +  | +  |
| Glenn et al. [56]         | - | + | + | + | + | + | + | + | + | - | - | - | - | -  | +  | + | +  | + | +  | + | -  | +  | +  | +  | +  | +  | +  | +  | +  |
| Gross et al. [9]          | - | + | + | + | + | + | + | + | + | - | - | - | - | -  | +  | + | +  | + | +  | - | +  | +  | +  | +  | +  | +  | +  | +  | -  |
| Gross et al. [23]         | - | + | + | + | + | + | - | + | + | - | - | - | - | +  | +  | + | +  | + | +  | + | -  | +  | +  | +  | -  | +  | +  | +  | +  |
| Hill et al. [4]           | - | + | + | + | + | + | + | + | + | - | - | - | - | -  | +  | + | +  | + | +  | + | -  | +  | +  | +  | +  | +  | +  | +  | +  |
| Hobson et al. [38]        | - | + | + | + | + | + | - | + | + | - | + | + | - | -  | +  | + | +  | + | +  | - | -  | +  | +  | +  | +  | +  | +  | +  | +  |
| Hoffman et al. [57]       | - | + | + | + | + | + | + | + | + | + | + | + | + | -  | +  | + | +  | + | +  | + | -  | -  | +  | +  | -  | +  | +  | +  | +  |
| Hoffman et al. [58]       | - | + | + | + | + | + | + | + | + | + | + | + | + | -  | +  | + | +  | + | +  | - | -  | -  | +  | +  | -  | +  | +  | +  | +  |
| Howe et al. [59]          | - | + | + | + | + | + | + | + | + | - | - | - | - | -  | +  | + | +  | + | +  | - | -  | -  | +  | +  | +  | +  | +  | +  | +  |
| Jagim et al. [60]         | - | + | + | + | + | + | + | + | + | - | - | - | - | -  | +  | + | +  | + | +  | - | -  | +  | +  | +  | -  | +  | +  | +  | +  |
| James et al. [39]         | - | + | + | + | + | + | + | + | + | - | - | - | - | +  | +  | + | +  | + | +  | + | +  | +  | +  | +  | +  | +  | +  | +  | +  |
| Jordan et al. [61]        | - | + | + | + | + | + | + | + | + | - | - | - | - | -  | +  | + | +  | + | +  | - | -  | +  | +  | +  | +  | +  | +  | +  | +  |
| Okudan et al. [62]        | - | + | + | + | + | + | + | + | + | - | - | - | - | -  | +  | + | +  | + | +  | - | -  | +  | +  | +  | -  | +  | +  | +  | +  |
| Painelli et al. [45]      | - | + | + | + | + | + | + | + | + | - | + | - | - | -  | +  | + | +  | + | +  | + | -  | +  | +  | +  | +  | +  | +  | +  | +  |
| Painelli et al. [41]      | - | + | + | + | + | + | + | + | + | - | - | - | - | -  | +  | + | +  | + | +  | + | -  | +  | +  | +  | +  | +  | +  | +  | +  |
| Sale et al. [17]          | - | + | + | + | + | + | + | + | + | - | + | - | - | -  | +  | + | +  | + | +  | + | -  | +  | +  | +  | +  | +  | +  | +  | +  |

<sup>1</sup> CONSORT 2010 checklist of information to include when reporting a randomised trial (adapted from Schulz et al., 2010).

|                         |   |   |   |   |   |   |   |   |   |   |   |   |   |   |   |   |   |   |   |   |   |   |   |   |   |   |   |   |   |   |
|-------------------------|---|---|---|---|---|---|---|---|---|---|---|---|---|---|---|---|---|---|---|---|---|---|---|---|---|---|---|---|---|---|
| Sale et al. [63]        | - | + | + | + | + | + | + | + | + | - | + | - | - | - | + | + | + | + | + | - | - | + | + | + | + | - | + | + | + | + |
| Saunders et al. [64]    | - | + | + | + | + | + | + | + | + | - | + | - | - | - | + | + | + | + | + | + | - | + | + | + | + | + | + | + | + | + |
| Saunders et al. [24]    | - | + | + | + | + | + | + | + | + | - | + | - | - | - | + | + | + | + | + | + | - | + | + | + | - | + | + | + | + |   |
| Saunders et al. [65]    | - | + | + | + | + | + | + | + | + | - | + | - | - | - | + | + | + | + | + | - | - | - | + | + | + | - | + | + | + |   |
| Smith et al. [66]       | - | + | + | + | + | + | + | + | + | - | - | - | - | - | + | + | + | + | + | - | - | - | + | + | - | - | + | + | + |   |
| Smith et al. [67]       | - | + | + | + | + | + | + | + | + | - | + | + | + | - | + | + | + | + | + | + | - | - | + | + | + | + | + | + | + |   |
| Smith-Ryan et al. [68]  | - | + | + | + | + | + | - | + | + | - | + | + | + | - | + | + | + | + | + | - | - | + | + | + | + | + | + | + | + |   |
| Smith-Ryan et al. [69]  | - | + | + | + | + | + | - | + | + | - | - | - | - | - | + | + | + | + | + | - | - | + | + | + | + | + | + | + | + |   |
| Stout et al. [70]       | - | + | + | + | + | + | - | + | + | - | - | - | - | - | + | + | + | + | + | - | - | - | + | + | - | - | + | + | + |   |
| Stout et al. [71]       | - | + | + | + | + | + | + | + | + | - | + | - | - | - | + | + | + | + | + | - | - | + | + | + | - | - | + | + | + |   |
| Stout et al. [25]       | - | + | + | + | + | + | + | + | + | - | - | - | - | - | + | + | + | + | + | - | - | + | + | + | - | - | + | + | + |   |
| Tobias et al. [46]      | - | + | + | + | + | + | - | + | + | - | - | - | - | - | + | + | + | + | + | + | - | + | + | + | + | + | + | + | + |   |
| van Thienen et al. [72] | - | + | + | + | + | + | + | + | + | - | - | - | - | - | + | + | + | + | + | + | - | - | + | + | + | + | + | + | + |   |
| Walter et al. [73]      | - | + | + | + | + | + | + | + | + | - | - | - | - | - | + | + | + | + | + | - | - | + | + | + | - | + | + | + | + |   |
| Zoeller et al. [74]     | - | + | + | + | + | + | + | + | + | - | - | - | - | - | + | + | + | + | + | - | - | - | + | + | - | + | + | + | + |   |

---
